# Supplementary material for: Three-Dimensional Reconstruction of Bacteria with a Complex Endomembrane System
Source: PLOS journal article supplement (doi:10.1371/journal.pbio.1001565), 2013-05-21

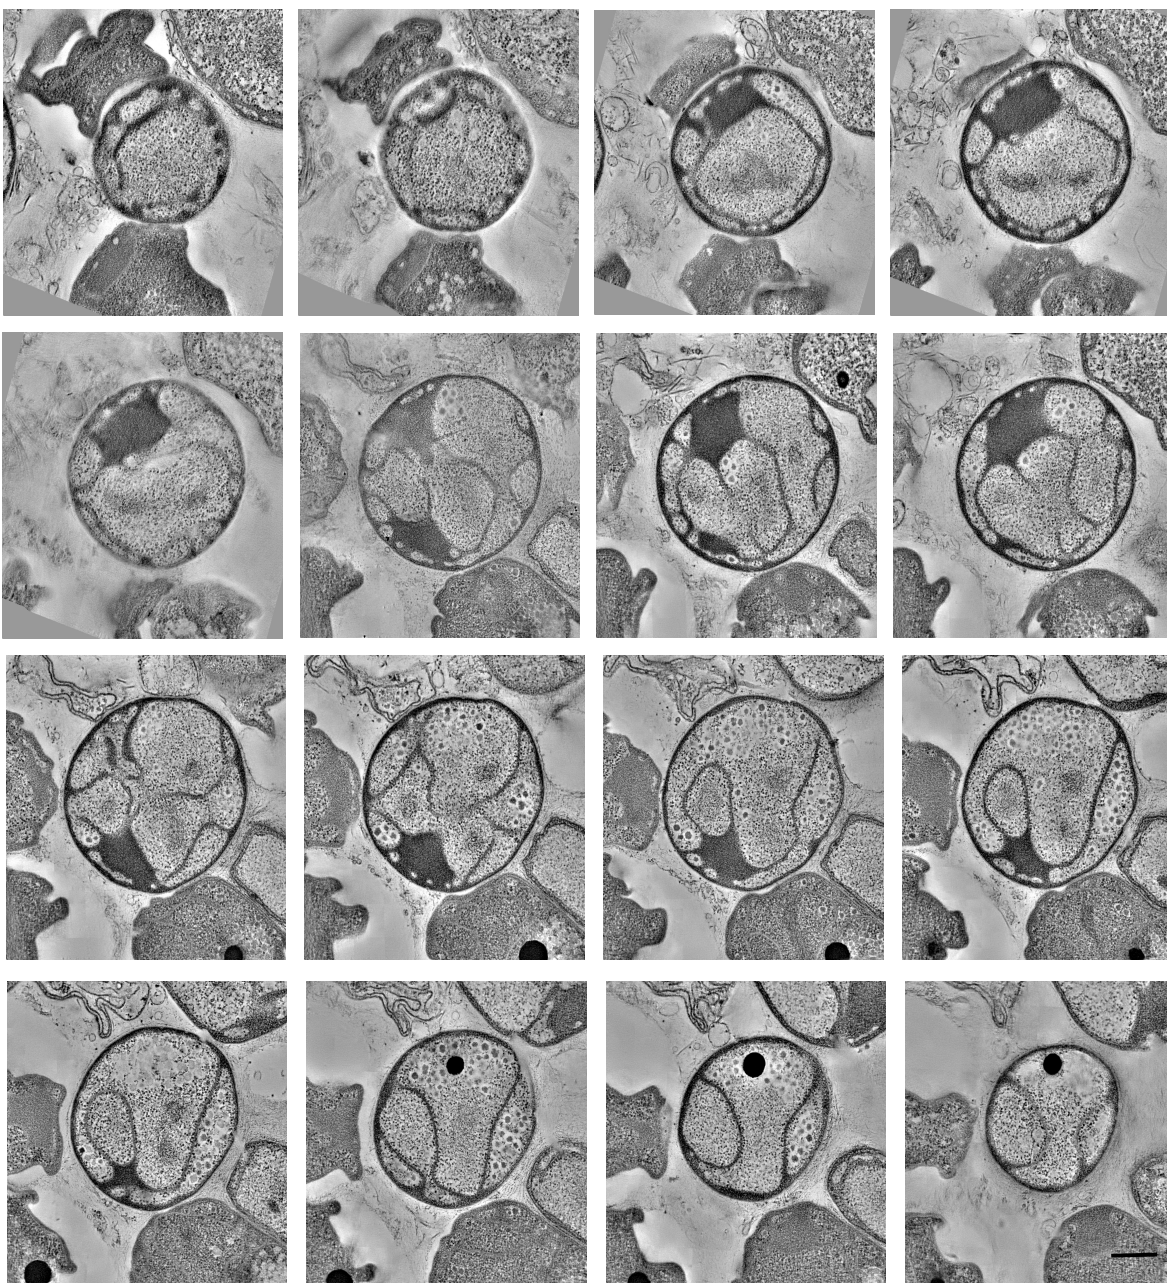

Supplement: S6 (10.1371/journal.pbio.1001565.s006) [file journal.pbio.1001565.s006]
